# Supplementary material for: Antimicrobial Effect of Copper Nanoparticles on Relevant Supragingival Oral Bacteria
Source: MDPI journal article supplement (doi:10.3390/microorganisms12030624), 2024-03-20
Supplement: s1 [file s1]

Table S1. Comparative Table of Antimicrobial agents used commonly over oral pathogens.

| Antimicrobial agent   | <i>S. mutans</i> (MIC µg/mL) | reference | <i>S. sanguinis</i> (MIC µg/mL) | reference  |
|-----------------------|------------------------------|-----------|---------------------------------|------------|
| Sodium fluoride       | 625                          | [1]       | 4                               | [2]        |
| Chlorhexidine         | 2.3                          | [1]       | 25                              | [3]        |
| Penicillin            | 0.05                         | [1]       | 2                               | [4]        |
| Chitosan              | 1250                         | [5]       | 1250                            | [5]        |
| Chitosan NPS          | 625                          | [5]       | 312                             | [5]        |
| Daptomycin            | 18.7                         | [3]       | 10.7                            | [3]        |
| Cu <sup>0</sup> NPs   | N.D. (>1000)                 | This job  | N.D. (>1000)                    | Our report |
| Cu <sub>2</sub> O NPs | 500                          | This job  | 1000                            | Our report |
| CuO NPs               | 400                          | This job  | 800                             | Our report |

1. Dong, L.; Tong, Z.; Linghu, D.; Lin, Y.; Tao, R.; Liu, J.; Tian, Y.; Ni, L. Effects of Sub-Minimum Inhibitory Concentrations of Antimicrobial Agents on Streptococcus Mutans Biofilm Formation. *Int J Antimicrob Agents* **2012**, *39*, 390–395, doi:10.1016/j.ijantimicag.2012.01.009.
2. Qian, W.; Zhang, J.; Xiao, X. [Research on Inhibition of Sodium Fluoride on Five Subgingival Bacteria in Vitro]. *Hua Xi Kou Qiang Yi Xue Za Zhi* **1998**.
3. Li, X.; Wang, Y.; Jiang, X.; Zeng, Y.; Zhao, X.; Washio, J.; Takahashi, N.; Zhang, L. Investigation of Drug Resistance of Caries-Related Streptococci to Antimicrobial Peptide GH12. *Front Cell Infect Microbiol* **2022**, *12*, doi:10.3389/FCIMB.2022.991938/FULL.
4. Doern, G. V.; Ferraro, M.J.; Brueggemann, A.B.; Ruoff, K.L. Emergence of High Rates of Antimicrobial Resistance among Viridans Group Streptococci in the United States. *Antimicrob Agents Chemother* **1996**, *40*, 891–894, doi:10.1128/AAC.40.4.891.
5. Aliasghari, A.; Khorasgani, M.R.; Vaezifar, S.; Rahimi, F.; Younesi, H.; Khoroushi, M. Evaluation of Antibacterial Efficiency of Chitosan and Chitosan Nanoparticles on Cariogenic Streptococci: An in Vitro Study. *Iran J Microbiol* **2016**, *8*, 93.
